# Supplementary material for: Genome-Wide Association Study Identifies a Novel Canine Glaucoma Locus
Source: PLoS One. 2013 Aug 7;8(8):e70903. doi: 10.1371/journal.pone.0070903 (PMC3737263; doi:10.1371/journal.pone.0070903)
Supplement: Table S2 — Primers used for sequencing of the coding regions and flanking splice sites of candidate genes. (XLSX) [file pone.0070903.s003.xlsx]

## Sheet: Sheet1
Table S2. Primers for candidate genes.
Gene symbol	Name of the primer	Canine chromosome	Exon	Primer F (5'–3')	Primer R (5'–3')	Product size (bp)	Annealing T (°C)	DMSO (%)	MgCl2 (mM)
CTAGE5	CTAGE5_exon1	CFA8	1	CTTCAGCACCCCTTTACCAC	CCCTGTAGCAAAAACACGGTA	281	58
	CTAGE5_exon2	CFA8	2	CCCTCATGATCACCTCCCTA	ACACTGGGATATGGCAATACA	392	58
	CTAGE5_exon3	CFA8	3	CATACTAAGGCAATAAGAAACCAGT	CACTGAAATATTGGCACTGAAAA	400	55
	CTAGE5_exon4	CFA8	4	GAAGAACTTGAAGCTCAGCAAA	TGTAAAATAGTTTTGAGGAGAACACTG	300	58
	CTAGE5_exon5	CFA8	5	AAGTTTGCTGACCCCTGCTA	TGCCCTGACCTCCACATATT	359	58
	CTAGE5_exon6-7	CFA8	6-7	CTGTGGCATCTTAGGAACTGG	CCTCTCCACCCTCCCTACTC	897	55
	CTAGE5_exon8	CFA8	8	CCCAGCAATACATTGTGTTCTAT	CAAATTAAAATGAATGCCAAAAA	397	55
	CTAGE5_exon9	CFA8	9	CAGCAAAAGGCATTACCTCTC	CATGGTGCATAAAGGAACTAAAAA	248	58
	CTAGE5_exon10	CFA8	10	CAGGAAAAGGGATAAGGCTCT	AAGGACATACAGGTTTAATCCAAG	230	58
	CTAGE5_exon11	CFA8	11	GGTTGGGATGGTTGAGAATTT	TCAAATTGGATCTTTACATACGTG	250	58
	CTAGE5_exon12	CFA8	12	TTTTCTGTTGTCAGAAAGAATTTCA	CCCAATCCTAAGTTGAGCACT	366	55
	CTAGE5_exon13	CFA8	13	CAAATTGTTTCATGGGAACC	TGCATAAGAGCAAGATATCCAAA	340	58
	CTAGE5_exon14	CFA8	14	TTTTTACATAAAGCACTCCAGATG	TCTCTCTGTGTGTGTGTGACTATCAT	299	58
	CTAGE5_exon15	CFA8	15	TTCAGAGATGCTTGAGTTATTTTTG	GCTTCCTCTTGCTTGTGCTC	249	58
	CTAGE5_exon16	CFA8	16	TTTTACATTGAGTTTCTGAAATGGA	CACTGCCAGTTGTTTATCCCTA	292	55
	CTAGE5_exon17	CFA8	17	GTACCTTGCACTTGGTGGTG	CCTGGCTCCAAAATCTGAAA	296	58
	CTAGE5_exon18	CFA8	18	GGGTGACCTGATGGAAATTG	TGCAAGGAATGCCTGTATTTT	341	58
	CTAGE5_exon19	CFA8	19	TGTCCTAGGCTTTGGAAGGA	CAGGACATACATGCACTTCTTTTT	394	58
	CTAGE5_exon20	CFA8	20	GCAAGAGAAATGTCTGTGTCCA	TGGCCTTAAGAGCTACCAGAG	326	58
	CTAGE5_exon21	CFA8	21	TGGGGAAATATCAGCAATCC	CTGGTCAAAATGAGAGAAGCAG	277	58
	CTAGE5_exon22	CFA8	22	TGCTTTCTGCCTAGGTGCTT	ACTAATGGCTGGCTGCCTTC	476	58
	CTAGE5_exon23	CFA8	23	TCAGTTTTGGAATATAAAGATAGGTG	AAGACACAGCCTTCGGAGTT	597	60
FBXO33	FBXO33_exon1	CFA8	1	CCCTCAGTCGCTGAAGAAAG	CTTCTGCCACACTTGGTTCC	821	55	0.05
	FBXO33_exon2	CFA8	2	TCATGTGGCATAGCATATTTCAT	GAAACTTTTCTAGATACCCCCTTC	361	58
	FBXO33_exon3	CFA8	3	AAAAACCTGCATTTCAACTTGT	ACTTGTGGGCTGGATTGAAA	956	60
	FBXO33_exon4	CFA8	4	AAACACAGCACAAAGGGATT	AAAGGAAAAGGACCAAAGTGTT	492	58	0.05
LRFN5	LRFN5_exon1_1	CFA8	1	AAATCCCATGAGGCAATGAA	TCCCAGGGAATCGTTTCTAA	787	58
	LRFN5_exon1_2	CFA8	1	TCAGTGGGCTTTCCAATCTC	CTCAGAGTTGCCCTTTGACC	565	58
	LRFN5_exon1_3	CFA8	1	AGAGACTTGCGCTTCTCCAG	TTTCCCCACAGGTATTCACC	783	58
	LRFN5_exon2_1	CFA8	2	GAATCCAACAATGACTTTTAGCC	GTGGCAGTGAGGGAAGTGAT	300	58	0.05
	LRFN5_exon2_2	CFA8	2	TGTCAATAACCTGGCTGCTG	TGGTAGAGGAGTCCTGACTTGA	458	58	0.05
	LRFN5_exon2_3	CFA8	2	CTCAGATACAAGGCTGCAGTG	TCAGCAGGCAAAGTGAGAAA	397	58	0.05
	LRFN5_exon2_4	CFA8	2	CAGAATGAAGCGGTCACAAA	CTTGGCTCTATGAGGCATGT	460	58	0.05
PNN	PNN_exon1	CFA8	1	CATTGGCCCAGAGTCACAG	CCCCGATGTTCTAGCCTTC	397	58
	PNN_exon2	CFA8	2	ACCGCATCCGTGAAAGTATT	CAAACACATGGACTCTACTGCAA	247	58
	PNN_exon3	CFA8	3	AAGCATCTTGGAGTGGATGC	ACCAAGGAAATAGACAAGTGAAGT	362	58
	PNN_exon4-5	CFA8	4-5	TGGGATAGAGAGTGATAAAGTGAGA	TGGCACTTGGACAAGTCTTACA	494	58
	PNN_exon6	CFA8	6	TGGTGAGCTTAGAGGAAGTGG	GGCCTGCAACTCAGTTTTGT	770	58
	PNN_exon7-8	CFA8	7-8	TGTTTCACATGCAATCAGGA	TGCTTCATTAGCATTTATGTCTGG	694	58
	PNN_exon9_1	CFA8	9	TTTGTGACTGTCAAATCCTGAG	TCCTCAGGCTCATTTTCCAT	647	58
	PNN_exon9_2	CFA8	9	GGAATTTGAAGTTGAGCCAGA	CGACTTCGACTCTTGCTGGT	590	58
	PNN_exon9_3	CFA8	9	AGAGTCGAAGTCGCAGCAGT	CCACCTGATGCTCTTTTTCC	598	55
	PNN_exon9_4	CFA8	9	AGACGCATCGAATTTGCAG	GCTGGGGCTCAGATTCTCTC	600	58
	PNN_exon9_5	CFA8	9	AACTGGAGCCAGAGATGGAA	TGAAGATCTTTTGCCTGATCG	986	58
	PNN_exon9_6	CFA8	9	ATCGGAAACGAAGGGATACA	CCTTCAAAGACATTCTAATCACG	699	64
	PNN_exon9_7	CFA8	9	TTTTGGAATGTCCTCGTTGA	TTGTCAAGGGAGGAAACAGTA	834	58
TRAPPC6B	TRAPPC6B_exon1	CFA8	1	GCGACACAGGAGTTGAAGC	TAGACGGAAGCGGAAGTTGT	499	62	0.05	2.5
	TRAPPC6B_exon2	CFA8	2	GAAACATTTCAAAGGTGACTAAAAA	TGGGATCTTTTTGCTTTGTTC	376	55
	TRAPPC6B_exon3	CFA8	3	CAGACCTAAAAAGAAATTTTAATGTGA	CTCCTGCTCTCTCTCTCTCAAA	454		0.05	2.5
	TRAPPC6B_exon4	CFA8	4	ACACATGAACACCCGTCTCC	TTGAATTGTTTTGAAGGGAAGA	312	58
	TRAPPC6B_exon5	CFA8	5	AAGGCAGGCACTAAACTGCT	AGCACCTTAAGTCATGTGTCCA	385	58	0.05	2.5
	TRAPPC6B_exon6	CFA8	6	AACCTTACTCCTGCTTAAGAGTGC	TGAAATGGACTTTGTTGAGCA	362	62	0.05	2.5
