# Supplementary material for: Genome-Wide Association Study Identifies a Novel Canine Glaucoma Locus
Source: PLoS One. 2013 Aug 7;8(8):e70903. doi: 10.1371/journal.pone.0070903 (PMC3737263; doi:10.1371/journal.pone.0070903)
Supplement: Table S4 — The results of the sequencing of the candidate genes identified 6 coding and 12 intronic variants. None of the coding variants were expected to be causative. (XLSX) [file pone.0070903.s005.xlsx]

## Sheet: Sheet1
Table S4. The results of the candidate gene sequencing.
						Cases			Controls
Gene	mRNA	Sequence variation	Predicted protein	Polyphen2	SIFT	Homozygous for the alternate allele %	Heterozygous for the alternate allele %	Homozygous for the reference allele %	Homozygous for the alternate allele %	Heterozygous for the alternate allele %	Homozygous for the reference allele %
CTAGE5	XM_537421.3	c.954C>A	p.Q289K	benign	tolerated	0	25	75	0	0	100
		c.614+101C>G				0	33.3	66.7	0	50	50
		c.615-102T>C				0	33.3	66.7	0	25	75
		c.960+21C>T				0	25	75	0	25	75
		c.1504+28G>A				0	25	75	0	0	100
		c.2459+22G>A				0	25	75	0	0	100
FBXO33	XM_845904	c.1606C>T	p.D422D			25	25	50	25	25	50
LRFN5	XM_547788.2	c. 801A>C	p.A267A			50	0	50	0	25	75
		c.2141+17A>C				25	25	50	25	75	0
		c.2141+18T>C				25	25	50	25	75	0
PNN	NM_001003231.1	c. 1319A>G	p.E430E			0	75	25	0	75	25
		c.1550G>T	p.Q527H	unknown	tolerated	0	0	100	0	50	50
		c.1917A>C	p.R630R			0	66.7	33.3	66.7	33.3	0
		c.142+6insGAGA				25	50	25	50	25	25
		c.214+37C>T				0	0	100	0	50	50
		c.527+154G>A				25	25	50	0	75	25
TRAPPC6B	XM_537419.3	c.585+20A>G				66.7	33.3	0	75	25	0
		c.680-111C>T				0	100	0	0	100	0
